# Supplementary material
Source: PubMed Central journal article supplement (PMC4382417)
Supplement: NIHMS657335-supplement-1.pdf [file NIHMS657335-supplement-1.pdf]

## Atomic accuracy models from 4.5 Å cryo-electron microscopy data with density-guided local rebuilding

Frank DiMaio<sup>1,†</sup>, Yifan Song<sup>1,2,†</sup>, Xueming Li<sup>3,&</sup>, Matthias J. Brunner<sup>4,5,6,7</sup>, Chunfu Xu<sup>8</sup>, Vincent Conticello<sup>8</sup>, Edward Egelman<sup>9</sup>, Thomas Marlovits<sup>4,5,6,7</sup>, Yifan Cheng<sup>3</sup>, David Baker<sup>1,10,\*</sup>

<sup>1</sup> Department of Biochemistry, University of Washington, Seattle, WA, USA

<sup>2</sup> Cyrus Biotechnology, Inc., Seattle, WA, USA

<sup>3</sup> Keck Advanced Microscopy Laboratory, Department of Biochemistry and Biophysics, University of California, San Francisco, California, USA.

<sup>4</sup> Center for Structural Systems Biology (CSSB) University Medical Center Eppendorf-Hamburg (UKE), Hamburg, Germany

<sup>5</sup> Deutsches Elektronen-Synchrotron (DESY), Hamburg, Germany

<sup>6</sup> Institute of Molecular Biotechnology GmbH (IMBA), Austrian Academy of Sciences, Vienna, Austria

<sup>7</sup> Research Institute of Molecular Pathology (IMP), Vienna, Austria

<sup>8</sup> Department of Chemistry, Emory University, Atlanta, GA 30322

<sup>9</sup> Department of Biochemistry and Molecular Genetics, University of Virginia, Charlottesville, VA, USA

<sup>10</sup> Howard Hughes Medical Institute, University of Washington, Seattle, Washington, USA

†These authors contributed equally to this manuscript

\*To whom correspondence should be addressed. E-mail: [dabaker@u.washington.edu](mailto:dabaker@u.washington.edu)

&Current address: School of life science, Tsinghua University, Beijing, P.R. China, 100084

## Supplementary Information

**Supplementary Table 1.** A comparison to previously published methods. For a series of comparative models of 20S, our refinement was compared to two previously developed methods combining Rosetta refinement with experimental density data, comparing the fraction of C $\alpha$  atoms within 1 Å using the same starting models. *DiMaio 2009*<sup>1</sup> as well as *RosettaCM*<sup>2</sup> augmented with fit-to-density-energy are both outperformed by the *IterativeBuild* method reported here. Results are reported for 20S maps at 3.3 and 4.4Å resolution.

|                | 20S proteasome (3.3Å) |               |                    | 20S proteasome (4.4Å) |               |                    |
|----------------|-----------------------|---------------|--------------------|-----------------------|---------------|--------------------|
|                | DiMaio<br>2009        | Rosetta<br>CM | Iterative<br>Build | DiMaio<br>2009        | Rosetta<br>CM | Iterative<br>Build |
| <b>1yar</b>    | 0.90                  | 0.96          | 0.94               | 0.93                  | 0.94          | 0.88               |
| <b>3h4p</b>    | 0.86                  | 0.85          | 0.93               | 0.75                  | 0.79          | 0.81               |
| <b>1iru</b>    | 0.86                  | 0.90          | 0.92               | 0.83                  | 0.83          | 0.88               |
| <b>3unf</b>    | 0.77                  | 0.83          | 0.87               | 0.67                  | 0.70          | 0.78               |
| <b>3nzj</b>    | 0.85                  | 0.86          | 0.92               | 0.83                  | 0.78          | 0.81               |
| <b>1ryp</b>    | 0.79                  | 0.87          | 0.92               | 0.80                  | 0.80          | 0.87               |
| <b>1q5q</b>    | 0.61                  | 0.78          | 0.94               | 0.61                  | 0.58          | 0.68               |
| <b>1g0u</b>    | 0.58                  | 0.62          | 0.78               | 0.49                  | 0.50          | 0.76               |
| <b>4hnz</b>    | 0.29                  | 0.69          | 0.79               | 0.46                  | 0.61          | 0.68               |
| <b>2x3b</b>    | 0.42                  | 0.58          | 0.75               | 0.41                  | 0.48          | 0.61               |
| <b>1g3k</b>    | 0.42                  | 0.63          | 0.73               | 0.42                  | 0.45          | 0.58               |
| <b>1m4y</b>    | 0.37                  | 0.66          | 0.78               | 0.37                  | 0.55          | 0.72               |
| <b>Average</b> | <b>0.64</b>           | <b>0.77</b>   | <b>0.86</b>        | <b>0.63</b>           | <b>0.67</b>   | <b>0.76</b>        |

## Supplementary References

- 1 DiMaio, F., Tyka, M. D., Baker, M. L., Chiu, W. & Baker, D. Refinement of protein structures into low-resolution density maps using rosetta. *Journal of molecular biology* **392**, 181-190 (2009).
- 2 Song, Y. *et al.* High-Resolution Comparative Modeling with RosettaCM. *Structure* **21**, 1735-1742 (2013).
